# Supplementary material
Source: publisher site journal article supplement (https://www.spandidos-publications.com/2441/downloadSupplementary)
Supplement: Supplementary file 1 [file downloadSupplementary]

## Sheet: Supp table 1
Table SI. Scisoon ctDNA sequencing panel.
geneSymbol	region
ABL1	allExon
AKT1	allExon
ALK	allExon
APC	allExon
ATM	allExon
ATR	allExon
AURKA	allExon
BRAF	allExon
BRCA1	allExon
BRCA2	allExon
CCND1	allExon
CDH1	allExon
CDK1	allExon
CDK4	allExon
CDK6	allExon
CDKN2A	allExon
CHEK2	allExon
CSF1R	allExon
CTNNB1	allExon
DDR2	allExon
EGFR	allExon
ERBB2	allExon
ERBB3	allExon
ERBB4	allExon
ESR1	allExon
EZH2	allExon
FANCA	allExon
FBXW7	allExon
FCGR3A	allExon
FGF19	allExon
FGFR1	allExon
FGFR2	allExon
FGFR3	allExon
FGFR4	allExon
FLT3	allExon
FOXL2	allExon
GATA6	allExon
GNA11	allExon
GNAQ	allExon
GNAS	allExon
HIF1A	allExon
HNF1A	allExon
HRAS	allExon
IDH1	allExon
IDH2	allExon
IGF1R	allExon
JAK1	allExon
JAK2	allExon
JAK3	allExon
KDR	allExon
KIT	allExon
KRAS	allExon
MAP2K1	allExon
MAP2K2	allExon
MDM2	allExon
MET	allExon
MLH1	allExon
MPL	allExon
MSH2	allExon
MSH6	allExon
MTOR	allExon
MUTYH	allExon
MYC	allExon
MYD88	allExon
NF1	allExon
NOTCH1	allExon
NPM1	allExon
NRAS	allExon
NTRK1	allExon
NTRK2	allExon
NTRK3	allExon
PDGFRA	allExon
PDGFRB	allExon
PIK3CA	allExon
PTCH1	allExon
PTEN	allExon
RAD50	allExon
RAF1	allExon
RB1	allExon
RET	allExon
RICTOR	allExon
ROS1	allExon
SMAD4	allExon
SMARCA4	allExon
SMO	allExon
SRC	allExon
STAT5A	allExon
STK11	allExon
STK4	allExon
TP53	allExon
TSC1	allExon
TSC2	allExon
VEGFR1	allExon
VEGFR3	allExon
VHL	allExon
TEK	allExon
ABCB1	partialExon
ATIC	partialExon
C8orf34	partialExon
CBR3	partialExon
CYP1B1	partialExon
CYP2D6	partialExon
DPYD	partialExon
DYNC2H1	partialExon
ERCC1	partialExon
GSTP1	partialExon
HAS3	partialExon
MTHFR	partialExon
MTRR	partialExon
NQO1	partialExon
NT5C2	partialExon
NUDT15	partialExon
SEMA3C	partialExon
SOD2	partialExon
TPMT	partialExon
UGT1A1	partialExon
UGT1A9	partialExon
UMPS	partialExon
XPC	partialExon
XRCC1	partialExon
